# Supplementary material
Source: publisher site journal article supplement (https://www.dovepress.com/article/508088)
Supplement: Supplementary file 1 [file get_supplementary_file.php]

**Supplementary Table 1.** Characteristics of primary coronary intervention (PCI) for adult ED patients with STEMI

|  | 2017-2019  Mean | 2020 |
| --- | --- | --- |
| January |  |  |
| D2B<90 min% | 78% | 93% |
| Mean (minutes) | 79 | 57 |
| February |  |  |
| D2B<90 min% | 84% | 88% |
| Mean (minutes) | 72 | 64 |
| March |  |  |
| D2B<90 min% | 81% | 84% |
| Mean (minutes) | 87 | 103 |
| April |  |  |
| D2B<90 min% | 52% | 95% |
| Mean (minutes) | 106 | 63 |
| May |  |  |
| D2B<90 min% | 95% | 92% |
| Mean (minutes) | 60 | 55 |
| June |  |  |
| D2B<90 min% | 78% | 87% |
| Mean (minutes) | 80 | 75 |
| July |  |  |
| D2B<90 min% | 76% | 91% |
| Mean (minutes) | 78 | 66 |
| August |  |  |
| D2B<90 min% | 82% | 81% |
| Mean (minutes) | 79 | 73 |
| September |  |  |
| D2B<90 min% | 46% | 81% |
| Mean (minutes) | 95 | 75 |
| October |  |  |
| D2B<90 min% | 81% | 77% |
| Mean (minutes) | 66 | 86 |
| November |  | 22 |
| D2B<90 min% | 80% | 82% |
| Mean (minutes) | 77 | 77 |
| December |  |  |
| D2B<90 min% | 53% | 94% |
| Mean (minutes) | 82 | 60 |

D2B: Door-to-Balloon
